# Supplementary material
Source: HighWire-hosted journal article supplement (https://jitc.bmj.com/content/10/10/e005119)
Supplement: inline-supplementary-material-3 [file inline-supplementary-material-3.pdf]

SUPPLEMENTAL TABLE S1: Efficacy outcomes by RECIST 1.1

| <b>Response</b>                           | <b>No. of patients (%)</b>   |
|-------------------------------------------|------------------------------|
| Confirmed CR                              | 0                            |
| Confirmed PR                              | 4(20%)                       |
| ORR (confirmed CR + confirmed PR)         | 4(20%) (95% CI: 5.7-43.7%)   |
| Stable disease                            | 13(65%)                      |
| SD < 12 weeks                             | 3(15%)                       |
| SD ≥ 12 weeks                             | 10(50%)                      |
| SD ≥24 weeks                              | 6(30%)                       |
| CBR (CR+PR+SD ≥ 24 weeks)                 | 10(50%) (95% CI: 27.2-72.8%) |
| Progressive disease                       | 2(10%)                       |
| Not Evaluable                             | 1(5%)                        |
| Median duration of response (mo., 95% CI) | 10.07 (3.06 – NA)            |
| Median time to response (mo., 95% CI)     | NA (3.02 – NA)               |
| <b>Median PFS, months (95% CI)</b>        | <b>9.59 (2.76 – 16.06)</b>   |
| <b>Median OS, months (95% CI)</b>         | <b>NR (11.24 – NR)</b>       |

CBR, clinical benefit rate; CI, confidence interval; CR, complete response; OS, overall survival; PFS, progression-free survival; PR, partial response; SD, stable disease.

SUPPLEMENTAL TABLE S6: Efficacy outcomes by RECIST 1.1, based on PD-L1 and TIL status

|                                     | PD-L1 (evaluable in N=14) |                      |                   |                        | TILs (evaluable in N=14) |                        |
|-------------------------------------|---------------------------|----------------------|-------------------|------------------------|--------------------------|------------------------|
|                                     | (CPS ≥ 1)<br>N=8          | (CPS < 1)<br>N=6     | (CPS ≥ 10)<br>N=2 | (CPS < 10)<br>N=12     | ≥10%<br>N=7              | < 10%<br>N=7           |
| <b>ORR</b>                          | 25%<br>(3.2-65.1)         | 33%<br>(9.7-70)      | 0% (0-84.2)       | 33.3%<br>(9.9-65.1)    | 0 (0-41)                 | 57.1%<br>(18.4-90.1)   |
| <b>CBR</b>                          | 37.5%<br>(8.5-75.5)       | 67%<br>(30-90.3)     | 50% (1.3-98.7)    | 50% (21.1-78.9)        | 28.6%<br>(3.7-70.9)      | 71.4%(29-96.3)         |
| <b>PFS, median</b>                  | 6.2 mo<br>(1.0 – NR*)     | 6.1 mo<br>(1.4 – NR) | 9.6mo<br>(NR-NR)  | 2.9mo (1.4-14.4)       | 9.6 mo<br>(1.0- NR)      | 6.1 mo (1.4-14.4)      |
| <b>Duration of response, median</b> | 10.1 mos<br>(8.4 – 11.7)  | NA<br>(3.1 – NR)     | NA                | 10.1 mos<br>(3.1 – NR) | NA                       | 10.1 mos<br>(3.1 – NR) |

CPS, combined prognostic score; ORR, overall response rate; PFS, progression-free survival; TILs, tumor infiltrating lymphocytes.
